# Targeted Drug Repurposing Against the SARS-CoV-2 E Channel Identifies Blockers With *in vitro* Antiviral Activity

Prabhat Pratap Singh Tomar, Miriam Krugliak, and Isaiah Tuvia Arkin<sup>1</sup>

Department of Biological Chemistry, The Alexander Silberman Institute of Life Sciences, The Hebrew University of Jerusalem, Edmond J. Safra Campus Givat-Ram, Jerusalem 91904, Israel

This manuscript was compiled on February 24, 2021

**It is difficult to overstate the impact that COVID-19 had on humankind. The pandemic's etiological agent, SARS-CoV-2, is a member of the Coronaviridae, and as such, is an enveloped virus with ion channels in its membrane. Therefore, in an attempt to provide an option to curb the viral spread, we searched for blockers of its E protein viroporin. Using three bacteria-based assays, we identified eight compounds that exhibited activity after screening a library of ca. 3000 approved-for-human-use drugs. Reassuringly, analysis of viral replication in tissue culture indicated that most of the compounds could reduce infectivity to varying extents. In conclusion, targeting a particular channel in the virus for drug repurposing may increase our arsenal of treatment options to combat COVID-19 virulence.**

COVID-2019 | Ion Channel | Drug repurposing | Antiviral drug | Channel blocker

At the end of 2019, a new respiratory disease engulfed much of the globe. Approximately 100 million people were identified as carrying the virus in a year, with a mortality rate exceeding 2% (1). The pandemic's etiological agent was quickly identified as a new coronavirus (2, 3) and was found to be very similar to the virus that caused the SARS epidemic in 2002/3 (4, 5). Accordingly, the virus was named: SARS-CoV-2 (6).

As a member of the Coronaviridae, SARS-CoV-2 is an enveloped virus and contains several proteins in its membrane. One of the membrane constituents is the E protein, which has been implicated in viral assembly, release, and pathogenesis, based on studies in other coronaviruses (7). Notably, E proteins were shown to be essential for viral infectivity (8), and attenuated viruses that lack them were suggested to serve as vaccine candidates (9–12).

Functionally, E proteins from several coronaviruses, including the very similar SARS-CoV-1, were shown to possess cation-selective channel activity (13–15). Consequently, we have recently confirmed that the E protein from SARS-CoV-2 is also a channel using bacteria-based assays (16).

As a protein family, ion channels serve as excellent targets for pharmaceutical point intervention. For example, chemicals that manipulate ion channels are used to treat many diseases such as cystic fibrosis, epilepsy, arrhythmia, neurodegenerative diseases, hypertension, angina, and more (17).

Ion channels in viruses have also been suggested to serve as attractive drug targets (18). A prominent example is the anti-flu aminoadamantane drugs (19) that target influenza's M2 protein (20) by blocking its channel activity (21). Regrettably, wide-spread viral resistance has rendered aminoadamantanes ineffective (22).

Considering the above, we have decided to search for block-

ers against the SARS-CoV-2 E protein channel as a potential approach to curb infectivity. In preliminary studies employing a small library of channel blockers, we identified two low-affinity inhibitors of the protein (16), motivating further screening efforts. Therefore, in the current study, we focussed our search on a significantly larger library of ca. 3000 approved-for-use compounds. Drug repurposing as such minimizes the chemical space to explore and may potentially hasten any future regulatory steps.

## Results

The approach that we have taken involves two components employed in serial fashion. We started by screening a repurposed drug library using three bacteria-based assays. Subsequently, the antiviral activity of the hits was tested in tissue culture studies.

**Library screening.** Our screening strategy employed the analysis of bacteria that heterologously express the E protein. Subsequently, the effect of different chemicals on the channel may be examined by monitoring their impact on the bacteria.

To ensure proper membrane reconstitution, we used the MBP Fusion and Purification System (New England BioLabs, Ipswich, MA) in which the E protein was fused to the carboxy

## Significance Statement

The goal of our study was to expand the treatment arsenal against COVID-19. To that end, we have decided to focus on drug therapy, and as a target - the E protein, an ion channel in the virus. Ion channels as a family are excellent drug targets, but viral channels have been underexploited for pharmaceutical point intervention. To hasten future regulatory requirements and focus the chemical search space, we screened a library of ca. 3000 approved-for-human-use drugs using three independent bacteria-based assays. Our results yielded eight compounds, which were subsequently tested for antiviral activity in tissue culture. Gratifyingly, most compounds were able to reduce viral replication, and as such, both validate our approach and potentially augment our anti-COVID tool kit.

Conceptualization, I.T.A.; methodology, P.P.S.T. and M.K.; formal analysis, I.T.A., P.P.S.T. and M.K.; investigation, P.P.S.T. and M.K.; resources, I.T.A.; writing—original draft preparation, I.T.A.; writing—review and editing, I.T.A. and P.P.S.T.; visualization, I.T.A. and P.P.S.T.; supervision, I.T.A.; project administration, I.T.A.; funding acquisition, I.T.A.

The authors declare that they have filed a patent for second medicinal use of the compounds in question. In addition, I.T.A. has shares in a company that is in the process of commercializing the aforementioned compounds.

<sup>1</sup>To whom correspondence should be addressed. E-mail: arkin@huji.ac.il

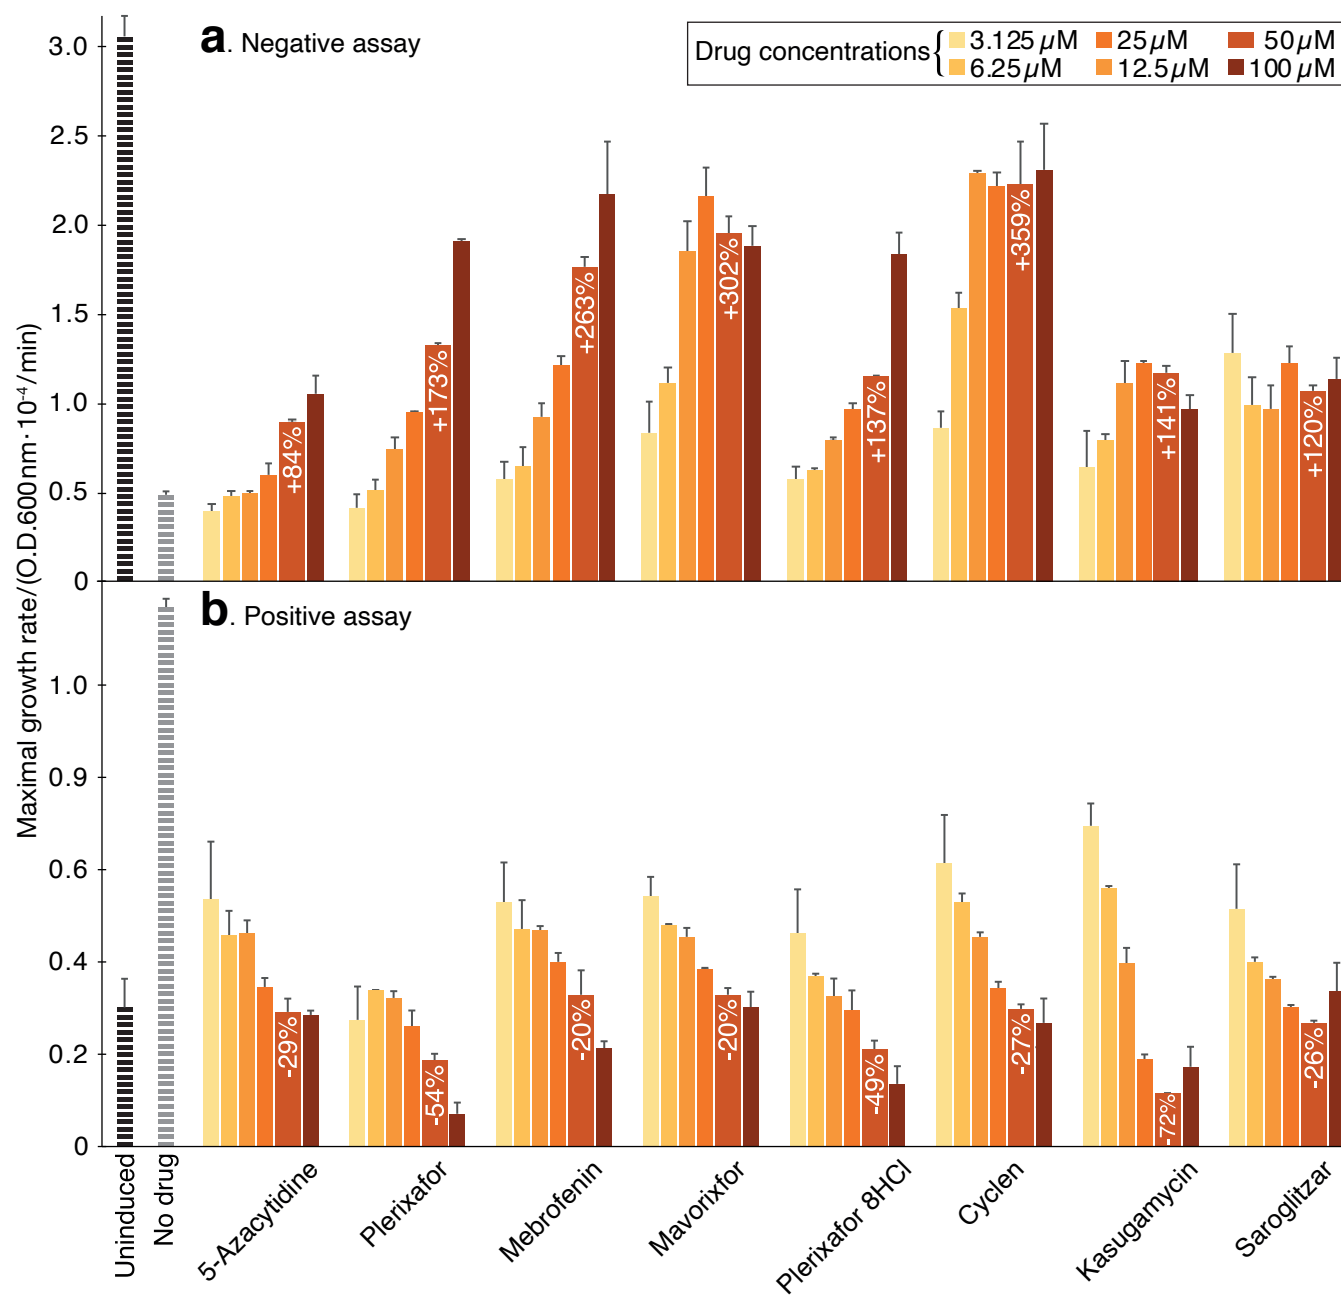

**Fig. 1.** Compound screening results using the negative and positive assays. **a.** Negative assay in which SARS-CoV-2 E protein is expressed at an elevated level (induction with 100 μM [ $\beta$ -D-1-thiogalactopyranoside]) and is therefore deleterious to bacteria. In this instance, inhibitory drugs enhance bacterial growth. **b.** Positive assay in which SARS-CoV-2 E protein is expressed at a low level (20 μM [ $\beta$ -D-1-thiogalactopyranoside]) in K<sup>+</sup>-uptake deficient bacteria. In this instance, inhibitory drugs reduce bacterial growth. The results in both panels may be compared to those obtained without any drug (black) or when the channel is uninduced (gray). The color scale indicates the different concentrations of the chemicals.

56 terminus of the maltose-binding protein. This system has been  
 57 used to express and study numerous other viral ion channels  
 58 successfully (23–26). Finally, we have recently shown that  
 59 SARS-CoV-2 E protein is also expressed in functional form  
 60 utilizing this construct (16).

61 **Negative assay.** The first assay that we used is one in which the  
 62 E protein is expressed at elevated levels in the bacteria. Conse-  
 63 quently, the bacteria experience growth retardation due  
 64 to excessive membrane permeabilization caused by the viral  
 65 channel. In other words, the viral channel impacts the bacteria

**negatively.** As a result, blockers of the viral channel may be  
 identified due to their ability to revive bacterial growth.

Using the above approach, we screened ca. 3000 chemi-  
 cals from the drug repurposing library of MedChem Express  
 (Monmouth Junction, NJ). Specifically, bacterial cultures were  
 grown overnight in 96-well plates, and the impact of each  
 chemical in the library at a concentration of 50 μM was tested  
 individually. Finally, any hit was then analyzed at several  
 different concentrations to obtain a dose-response curve.

The results shown in Figure 1a indicate that the following  
 eight chemicals are able to revive bacterial growth to vary-

77 ing extents: 5-Azacytidine (+84%), Plerixafor (+173%), Me-  
78 brofenin (+263%), Mavorixafor (trihydrochloride) (+302%),  
79 Plerixafor (octahydrochloride) (+137%), Cyclen (+359%), Ka-  
80 sugamycin (hydrochloride hydrate) (+141%), and Saroglitazar  
81 Magnesium (+120%). The values in parenthesis are the growth  
82 enhancement of each chemical at 50  $\mu\text{M}$  relative to untreated  
83 bacteria. Finally, see Supplementary Figures 1–8 for detailed  
84 chemical structures and raw growth curves of each of the  
85 compounds.

86 We recognize the potential of spurious factors to impact  
87 bacterial growth, leading to false identification of hits. There-  
88 fore, each chemical that scored positively in the negative assay  
89 was tested in a reciprocal assay, and in doing so, fallacious  
90 results are minimized significantly.

91 **Positive assay.** The second bacterial assay that we used is one  
92 in which the E protein is expressed at low levels in  $\text{K}^+$ -uptake  
93 deficient bacteria. These bacteria are incapable of growth  
94 unless the media is supplemented by  $\text{K}^+$  (27). However, when  
95 a channel capable of  $\text{K}^+$  transport is heterologously expressed,  
96 the bacteria can thrive even in low  $\text{K}^+$  media (25, 26). Hence,  
97 in this instance, the viral channel **positively** impacts the bac-  
98 teria, and channel blockers result in growth retardation. This  
99 scenario is entirely reciprocal to the negative assay described  
100 above.

101 Each of the hits identified in the negative assay was sub-  
102 jected to a dose-response analysis using the positive assay, as  
103 depicted in Figure 1b. The results present a mirror image of  
104 the negative assay, whereby in this instance the compounds  
105 decreased growth as follows: 5-Azacytidine (-29%), Plerix-  
106 afor (-54%), Mebrofenin (-20%), Mavorixafor (trihydrochlo-  
107 ride) (-20%), Plerixafor (octahydrochloride) (-49%), Cyclen  
108 (-27%), Kasugamycin (hydrochloride hydrate) (-72%), and  
109 Saroglitazar Magnesium (-26%). The values in parenthesis  
110 are the growth reduction of each chemical at 50  $\mu\text{M}$  relative  
111 to untreated bacteria. Detailed growth curves of each of the  
112 compounds can be found in Supplementary Figures 1–8.

113 **Fluorescence-based test.** The final test to examine the activity  
114 of channel blockers is based on detecting protein-mediated  
115  $\text{H}^+$  flux. Bacteria that express a chromosomally-encoded  
116 pH-sensitive green fluorescent protein (28) exhibit fluores-  
117 cence changes when their internal pH is altered. In particular,  
118 adding an acidic solution to the media will result in a readily  
119 detectable fluorescence change due to cytoplasmic acidification  
120 if the bacteria express a channel capable of  $\text{H}^+$  transport (29).  
121 Therefore, in this assay, blockers may be identified by their  
122 ability to diminish the fluorescence change.

123 As seen in Figure 2, most of the compounds are able to  
124 reduce the viroporin-induced fluorescence change with the  
125 exception of 5-Azacytidine and Mebrofenin. Saroglitazar was  
126 able to suppress the change entirely, while the impact of Cyclen  
127 was minor. Results at several drug concentrations including  
128 error bars can be found in Supplementary Figures 1–8.

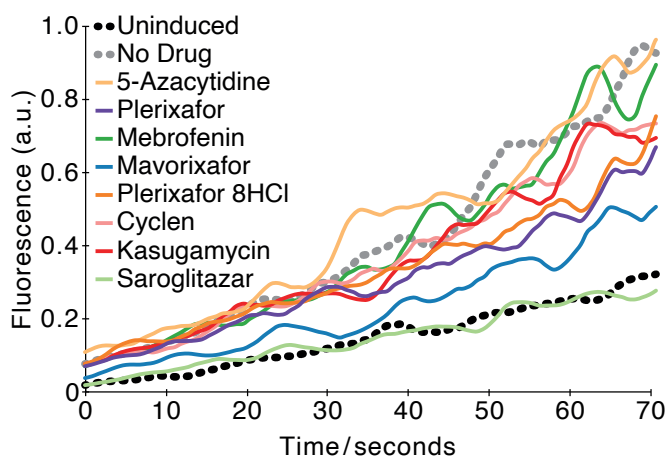

Fig. 2. Fluorescence-based conductivity assay. The fluorescence of bacteria that harbor a pH sensitive GFP (28) and express the SARS-CoV-2 E protein was examined as a function of different chemicals at a concentration of 50  $\mu\text{M}$ . The experiment was performed as previously described (29), whereby at time 0, a concentrated solution of citric acid was injected into the media. The results may be compared to those obtained without any drug (black) or when the channel expression was not induced (gray).

129 **Antiviral activity.** After completing the library screening, we  
130 tested the antiviral activity of each of the eight chemicals  
131 in Vero E6 tissue culture cells. Two additional compounds,  
132 gliclazide and memantine identified in a previous small screen  
133 (16) were also included.

134 The results shown in Figure 3a indicate that most of the  
135 chemicals are able to reduce viral replication as follows: 5-  
136 Azacytidine (-98%), Plerixafor (-53%), Mebrofenin (-45%),  
137 Mavorixafor (trihydrochloride) (-41%), Plerixafor (octahy-  
138 drochloride) (-40%), Gliclazide (-41%), Cyclen (-38%), Kasu-  
139 gamycin (hydrochloride hydrate) (-27%), Saroglitazar Magne-  
140 sium (-18%), and Memantine (-3%). The values in parenthesis  
141 are the growth reduction of each chemical at 10  $\mu\text{M}$  relative  
142 to untreated cells.

143 Finally, we estimated the the toxicity of each compound  
144 by assessing the cellular metabolic activity using a standard  
145 MTT assay (30), as shown in Figure 3b.

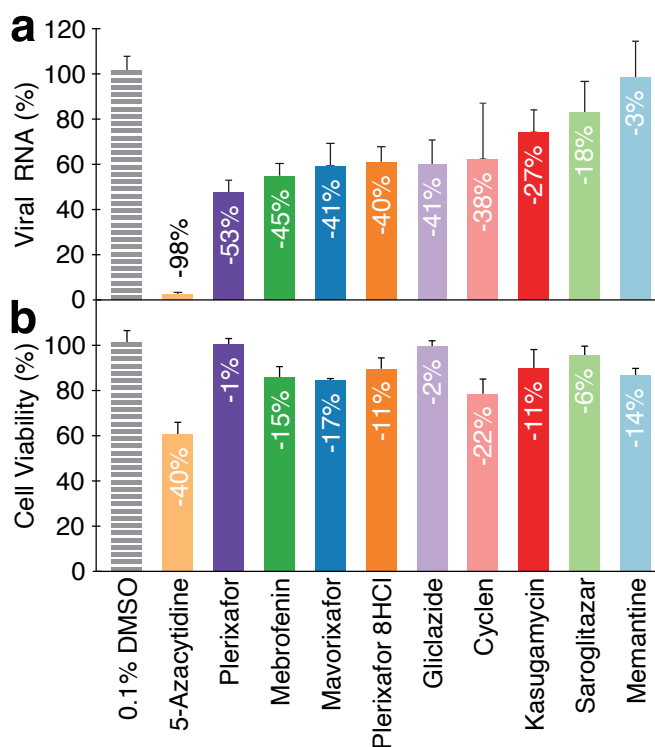

**Fig. 3.** Tissue culture analysis of antiviral activity. a. The antiviral activity of each of the compounds at 10  $\mu$ M concentration was tested by its ability to minimize viral growth in Vero E6 cells as estimated by production of viral RNA. b. The toxicity of each of the compounds was measured using the 3-(4,5-dimethylthiazol-2-yl)-2,5-diphenyltetrazolium (MTT) assay (30). In both panels the results are compared to a blank treatment of 0.1% DMSO.

## Discussion

Repurposing has proven to be a reliable route towards drug discovery, in general, and for identifying antiviral drugs in particular. For example, the repurposing of azidothymidine (AZT) to combat AIDS (31, 32) was reported more than twenty years after its first description in 1964 (33).

Repurposing also represents one of the fastest approaches to curb infectivity (34). As an example, the only antiviral drug that is currently approved against COVID-19 is a product of repurposing - remdesivir. While its efficacy may still be a matter of contention (35–37), it is nonetheless an example of the speed at which drug repurposing can react to a health crisis.

Considering the above, it is not surprising that there have been numerous repurposing studies against SARS-CoV-2. While the vast majority have employed *in silico* screening, others have taken an experimental route. For example, Riva and co-workers screened 12,000 clinical-stage or FDA-approved drugs for their ability to inhibit viral replication (38). The encouraging results of this monumental study were 21 molecules that exhibited a dose-response activity profile.

Herein, a different and complementary approach was taken, focussing the screen on a single target of the virus - the E protein. Our rationale stemmed from the fact that channels are attractive drug targets, and searching for inhibitors against them is both rapid and economically viable in an academic setting. Furthermore, genetic selections in bacteria may cast a wider net when targeting an individual protein due to the host's higher toxicity tolerance. Such studies also open the

door to mutational analyses that may provide insight into protein function and drug resistance mechanisms (23).

Three independent bacteria-based assays were used to search the repurposed drug library. The first two tests are reciprocal, whereby in the negative assay, the channel is detrimental to bacterial growth, while in the positive assay, it is beneficial. Consequently, blockers will yield the opposite outcomes in both assays: In the negative assay, they will enhance growth, while in the positive assay, they will retard it. The use of two assays minimizes any erroneous hits: The negative assay is susceptible to any pleiotropic growth enhancers' activity leading to false positives. Similarly, the positive assay would score a hit for any toxic compound. Yet, it is difficult to imagine how a drug can enhance the growth of bacteria in the negative assay while at the same time retard them in the positive assay if its effect was not specific. As an example, Plerixafor enhances bacterial growth fourfold in the negative assay and inhibits growth by sixfold in the positive assay.

The outcome of both tests comprised the list of compounds to be tested for antiviral activity. However, a third, fluorescence-based assay was employed to provide potential validation to the hits. In this test, a pH-sensitive GFP can report on the change of the cytoplasm's acidity (28). Subsequently, the activity of a channel that is capable of H<sup>+</sup> transport can be detected by measuring the fluorescence change due to acidification of the external media. Consequently, channel blockers would diminish the fluorescence change leading to their identification.

Gratifyingly, most of the hits identified by the positive and negative assays were able to lower the fluorescence change, except for 5-Azacytidine and Meflofenin (Figure 2). Since non-specific factors influencing pH may obfuscate detection, we decided not to eliminate the latter two chemicals from our hits list to be as inclusive as possible.

In analyzing the outcomes of the screening tests, it is essential to realize that the assays are bacteria-based and, as such, should not be compared quantitatively to one another. Therefore, for screening purposes, any chemical that passed the positive and negative assay was pursued further. In addition we added to the list of hits obtained in the current study, glioclazide and memantine, identified from a previous small screen of focussed on channel blockers (16).

The results of the antiviral study in tissue culture were encouraging. Out of the ten chemicals in question, six reduced viral loads by 38–51%, two by 18–27%, and one by 98%. Memantine reduced viral RNA by a mere 3%, reflective of its low affinity (16). The different compounds also did not exhibit appreciable toxicity, except for 5-Azacytidine, a fact that may explain its extraordinary antiviral activity.

None of the compounds that the current screen yielded were identified by the large repurposing study of Riva and coworkers (38). One obvious factor that may explain the different outcomes between the two studies is stringency. Riva and coworkers screened every chemical at 5  $\mu$ M, whereas the current research in bacteria employed 50  $\mu$ M. Screening at this higher concentration stemmed from our desire to cast a wide net, which is feasible in the more tolerant bacterial system. While molecules can emerge from the bacterial screen with lower affinities, they may still be beneficial, serving as a starting point for detailed chemical exploration. Moreover, low-affinity drugs that block the E-channel may interact syn-



ergistically with inhibitors of other targets in the virus.

We recognize that while the compounds were retrieved by a screen searching for blockers of the E channel, they may impact the virus by a different route. This is particularly plausible for 5-Azacytidine that may rewire extensive transcriptional networks due to its influence on DNA methylation (39, 40).

In conclusion, we present a list of approved compounds for human use that inhibit SARS-CoV-2 to varying extents. Moreover, our approach may be used to screen rapidly for blockers of other viral ion channels in an effort to curb the virulence of their pathogenic host.

1. E Dong, H Du, L Gardner, An interactive web-based dashboard to track covid-19 in real time. *Lancet Infect Dis* **20**, 533–534 (2020).
2. R Lu, et al., Genomic characterisation and epidemiology of 2019 novel coronavirus: implications for virus origins and receptor binding. *Lancet* **395**, 565–574 (2020).
3. F Wu, et al., A new coronavirus associated with human respiratory disease in china. *Nature* (2020).
4. TG Ksiazek, et al., A novel coronavirus associated with severe acute respiratory syndrome. *N Engl J Med* **348**(20), 1953–66 (2003).
5. PA Rota, et al., Characterization of a novel coronavirus associated with severe acute respiratory syndrome. *Science* **300**(5624), 1394–9 (2003).
6. Y Wu, et al., Sars-cov-2 is an appropriate name for the new coronavirus. *Lancet* **395**, 949–950 (2020).
7. D Schoeman, BC Fielding, Coronavirus envelope protein: current knowledge. *Viral J* **16**, 69 (2019).
8. ML DeDiego, et al., A severe acute respiratory syndrome coronavirus that lacks the e gene is attenuated in vitro and in vivo. *J Virol* **81**, 1701–13 (2007).
9. C Fett, ML DeDiego, JA Regla-Nava, L Enjuanes, S Perlman, Complete protection against severe acute respiratory syndrome coronavirus-mediated lethal respiratory disease in aged mice by immunization with a mouse-adapted virus lacking e protein. *J Virol* **87**, 6551–9 (2013).
10. EW Lamirande, et al., A live attenuated severe acute respiratory syndrome coronavirus is immunogenic and efficacious in golden syrian hamsters. *J Virol* **82**, 7721–4 (2008).
11. J Netland, et al., Immunization with an attenuated severe acute respiratory syndrome coronavirus deleted in e protein protects against lethal respiratory disease. *Virology* **399**, 120–128 (2010).
12. JA Regla-Nava, et al., Severe acute respiratory syndrome coronaviruses with mutations in the e protein are attenuated and promising vaccine candidates. *J Virol* **89**, 3870–87 (2015).
13. L Wilson, C McKinlay, P Gage, G Ewart, Sars coronavirus e protein forms cation-selective ion channels. *Virology* **330**, 322–31 (2004).
14. L Wilson, P Gage, G Ewart, Hexamethylene amiloride blocks e protein ion channels and inhibits coronavirus replication. *Virology* **353**, 294–306 (2006).
15. W Surya, Y Li, C Verdià-Bàguena, VM Aguilera, J Torres, Mers coronavirus envelope protein has a single transmembrane domain that forms pentameric ion channels. *Virus Res* **201**, 61–6 (2015).
16. PP Singh Tomar, IT Arkin, Sars-cov-2 e protein is a potential ion channel that can be inhibited by gliclazide and memantine. *Biochem. Biophys Res Commun* **530**, 10–14 (2020).
17. J Zheng, MC Trudeau, eds., *Handbook of ion channels*. (CRC Press), (2015).
18. C Scott, S Griffin, Viroporins: structure, function and potential as antiviral targets. *J Gen Virol* **96**, 2000–2027 (2015).
19. WL Davies, et al., Antiviral activity of 1-adamantanamine (amantadine). *Science* **144**, 862–3 (1964).
20. AJ Hay, AJ Wolstenholme, JJ Skehel, MH Smith, The molecular basis of the specific anti-influenza action of amantadine. *EMBO J* **4**, 3021–4 (1985).
21. LH Pinto, LJ Holsinger, RA Lamb, Influenza Virus M2 Protein Has Ion Channel Activity. *Cell* **69**, 517–28 (1992).
22. Y Guan, H Chen, Resistance to anti-influenza agents. *Lancet* **366**, 1139–40 (2005).
23. D Assa, R Alhadeff, M Krugliak, IT Arkin, Mapping the resistance potential of influenza's h+ channel against an antiviral blocker. *J Mol Biol* **428**, 4209–4217 (2016).
24. P Astrahan, et al., Quantitative analysis of influenza m2 channel blockers. *Biochim Biophys Acta* **1808**, 394–8 (2011).
25. R Taube, R Alhadeff, D Assa, M Krugliak, IT Arkin, Bacteria-based analysis of hiv-1 vpu channel activity. *PLoS One* **9**, e105387 (2014).
26. PPS Tomar, R Oren, M Krugliak, IT Arkin, Potential viroporin candidates from pathogenic viruses using bacteria-based bioassays. *Viruses* **11** (2019).
27. S Stumpe, EP Bakker, Requirement of a Large K<sup>+</sup>-Uptake Capacity and of Extracytoplasmic Protease Activity for Protamine Resistance of Escherichia Coli. *Arch Microbiol* **167**, 126–36 (1997).
28. Miesenböck, G and De Angelis, D A and Rothman, J E, Visualizing secretion and synaptic transmission with ph-sensitive green fluorescent proteins. *Nature* **394**, 192–5 (1998).
29. P Santner, et al., A robust proton flux (phlux) assay for studying the function and inhibition of the influenza a m2 proton channel. *Biochemistry* **57**, 5949–5956 (2018).
30. T Mosmann, Rapid colorimetric assay for cellular growth and survival: application to proliferation and cytotoxicity assays. *J Immunol Methods* **65**, 55–63 (1983).
31. H Mitsuya, et al., 3'-azido-3'-deoxythymidine (bw a509u): an antiviral agent that inhibits the infectivity and cytopathic effect of human t-lymphotropic virus type iii/lymphadenopathy-associated virus in vitro. *Proc Natl Acad Sci U S A* **82**, 7096–100 (1985).
32. MA Fischl, et al., The efficacy of azidothymidine (azt) in the treatment of patients with aids and aids-related complex. a double-blind, placebo-controlled trial. *N Engl J Med* **317**, 185–91 (1987).

33. JP Horwitz, J Chua, M Noel, Nucleosides. v. the monomesylates of 1-(2'-deoxy- $\beta$ -d-lyxofuranosyl)thymine1,2. *The J. Org. Chem.* **29**, 2076–2078 (1964).
34. G Li, E De Clercq, Therapeutic options for the 2019 novel coronavirus (2019-ncov). *Nat Rev Drug Discov* **19**, 149–150 (2020).
35. JH Beigel, et al., Remdesivir for the treatment of covid-19 - final report. *N Engl J Med* **383**, 1813–1826 (2020).
36. J Hsu, Covid-19: What now for remdesivir? *BMJ* **371**, m4457 (2020).
37. WHO Solidarity Trial Consortium, et al., Repurposed antiviral drugs for covid-19 - interim who solidarity trial results. *N Engl J Med* (2020).
38. L Riva, et al., Discovery of sars-cov-2 antiviral drugs through large-scale compound repurposing. *Nature* **586**, 113–119 (2020).
39. PA Jones, SM Taylor, Cellular differentiation, cytidine analogs and dna methylation. *Cell* **20**, 85–93 (1980).
40. SM Taylor, PA Constantinides, PA Jones, 5-azacytidine, dna methylation, and differentiation. *Curr Top Microbiol Immunol* **108**, 115–27 (1984).
41. P Santner, et al., Random mutagenesis analysis of the influenza a m2 proton channel reveals novel resistance mutants. *Biochemistry* **57**, 5957–5968 (2018).
42. Y Weisblum, et al., Modeling of human cytomegalovirus maternal-fetal transmission in a novel decidua organ culture. *J Virol* **85**, 13204–13 (2011).

## Materials and Methods

**Channel assays.** All three bacteria-based assays were conducted as described previously (16, 26).

In brief, over-night bacterial cultures were diluted and grown until their O.D.600 reached 0.2. 50  $\mu$ l of culture were subsequently transferred into 96-well flat-bottomed plates containing 50  $\mu$ l of the different treatments. Protein induction was achieved by adding  $\beta$ -D-1-thiogalactopyranoside at 100  $\mu$ M or 20  $\mu$ M for the negative and positive assays, respectively. D-glucose was added to a concentration of 1%. The plates were incubated for 16 hours at 37°C in a multi-plate incubator (Tecan Group, Männedorf, Switzerland) at a constant high shaking rate. O.D.600 readings were recorded every 15 min on a Infinite 200 plate reader (Tecan Group). For every measurement duplicates, or triplicates were conducted.

The positive assay was conducted in a similar manner except that the K<sup>+</sup>-uptake deficient bacteria were grown overnight and diluted in LB media in which Na<sup>+</sup> was replaced by K<sup>+</sup>. Thereafter, the growth medium was replaced to LB that was supplemented with 5 mM KCl.

The fluorescence-based assay was conducted with bacteria that harbor a chromosomal copy of a pH-sensitive GFP (29, 41). Overnight cultures were diluted 1:500 in LB media and grown up to an O.D.600 of 0.6–0.8. E protein expression was then induced by adding of 50  $\mu$ M  $\beta$ -D-1-thiogalactopyranoside to the growth media. After one hour of induction, the O.D.600 of all cells were measured, and after pelleting at 3500 g for 10 min, the bacteria were resuspended in McIlvaine buffer (200 mM Na<sub>2</sub>HPO<sub>4</sub>, 0.9%NaCl adjusted to pH 7.6 with 0.1 M citric acid, 0.9%NaCl) to optical density of 0.25 at 600 nm. 200  $\mu$ l of cell suspension were subsequently transferred with 30  $\mu$ l of McIlvaine buffer to 96 well plate. The plate includes a row with only assay buffer and cultures without induction. The fluorescence measurement were carried out in a Infinite F200 pro microplate reader (Tecan Group, Männedorf, Switzerland).

At time zero, 70  $\mu$ l of 300 mM Citric acid with 0.9% NaCl were added to the bacteria. The fluorescence emission of each well after addition of acid was measured by alternate read out of the two wavelengths for 30 seconds. The ratio for the two differently excited emissions,  $\mathcal{F} = F_{390\text{ nm}}/F_{466\text{ nm}}$  was calculated and translated into proton concentration according to (29, 41).

**Chemical screening.** A library of 2839 repurposed drugs was purchased from MedChem Express (HY-L035, Monmouth Junction, NJ). Note that the number of chemicals in the library changes with time. Each chemical was added at 50  $\mu$ M concentration to the growth media with a total concentration of Dimethyl sulfoxide not exceeding 1%. All manipulations and growths were conducted on a Tecan EVO 75 robotic station (Männedorf, CH).

At first we screened all compounds in the negative assay using 96 well plates. Each plate had a positive and negative control. The positive control were bacteria in which channel expression was not induced, i.e., without  $\beta$ -D-1-thiogalactopyranoside. The negative control were bacteria to which DMSO was added without any chemicals.

387 Bacteria that exhibited growth enhancement above a certain  
388 empirical threshold were tested again in duplicate. Every compound  
389 that passed this test was then used in the positive assay in duplicate.  
390 Compounds that passed the positive and negative screen were then  
391 subjected to a dose-response analysis as well as a fluorescence-based  
392 study.

#### 393 **Antiviral activity in tissue culture.**

394 **Cells and viruses.** Simian kidney Vero E6 (ATCC CRL-1586) cells  
395 were maintained in Eagle's Minimum Essential Medium (EMEM;  
396 Biological Industries, Beit Haemek, Israel), supplemented with  
397 10% fetal bovine serum, 2 mM L-Glutamine, 10 IU/ml Penicillin,  
398 and 10 µg/ml streptomycin (Biological Industries, Beit Haemek,  
399 Israel). SARS-CoV-2 clinical isolate (SARS-CoV-2 isolate Israel-  
400 Jerusalem-854/2020) was isolated on Vero E6 cells from a positive  
401 nasopharyngeal swab sample, obtained at the Hadassah Hospital  
402 Clinical Virology Laboratory. The virus was isolated and propagated  
403 (3 passages) in Vero E6 cells, and sequence verified. The virus titers  
404 of cleared infected cells supernatants were determined by a standard  
405 TCID<sub>50</sub> assay on Vero E6 cells. Cell viability was monitored by the  
406 mitochondrial dehydrogenase enzyme (MTT) assay as previously  
407 described (42). All infection and tissue processing experiments were  
408 performed in a BSL-3 facility.

409 **Antiviral susceptibility assay.** Vero-E6 cells were pretreated for one  
410 hour with the tested compounds at 10 µM, and were infected with  
411 SARS-CoV-2 at a multiplicity of infection (MOI) of 0.001–0.005 in  
412 the presence of the compounds (which were added to the culture at  
413 the time of viral inoculation, and further added during the culture  
414 incubation time). The medium with the same DMSO concentration  
415 was used as the no-drug control. Drug efficacies were assessed at 48  
416 hours post infection by quantitation of the viral genomic RNA in  
417 the cell supernatants and the viral sub-genomic RNA within the  
418 infected cells.

419 **RNA purification and quantification.** Infected- and mock-infected cell  
420 cultures' supernatants were flash-frozen and stored at -80°C until  
421 assayed. RNA was extracted using NucleoSpin RNA Mini kit for  
422 RNA purification (Macherey-Nagel, Cat #740955.250) according  
423 to the manufacturer's instructions, and subjected to reverse tran-  
424 scription, using High-Capacity cDNA Reverse Transcription Kit  
425 (Thermo Fisher Scientific, Cat#). Quantitative real time (RT)-PCR  
426 was performed on a Quantstudio 3™ (Thermo Fisher Scientific)  
427 instrument, using TaqMan™ Fast Advanced Master Mix (Thermo  
428 Fisher Scientific, Cat# 4444558), with primers and probe targeted  
429 to the E gene.

430 **ACKNOWLEDGMENTS.** This work was supported in part by  
431 grants from the Israeli Science Foundation, and the Israeli Science  
432 Ministry. The authors wish to thank Prof. Wolf and Ms. Hamdan  
433 from the Hadassah University Hospital for conducting the *in vitro*  
434 experiments, Prof. D. Engelberg and Dr. O. Cohen for technical  
435 assistance and useful discussions, and Prof. H Cedar for useful  
436 discussions. I.T.A. is the Arthur Lejwa Professor of Structural  
437 Biochemistry at the Hebrew University of Jerusalem.
